# Supplementary material
Source: MDPI journal article supplement (https://www.mdpi.com/1999-4907/7/5/109)
Supplement: s1 [file s1]

# Supplementary Materials: The Effects of Disturbance History on Ground-Layer Plant Community Composition in British Columbia

Michael Ton and Meg A. Krawchuk

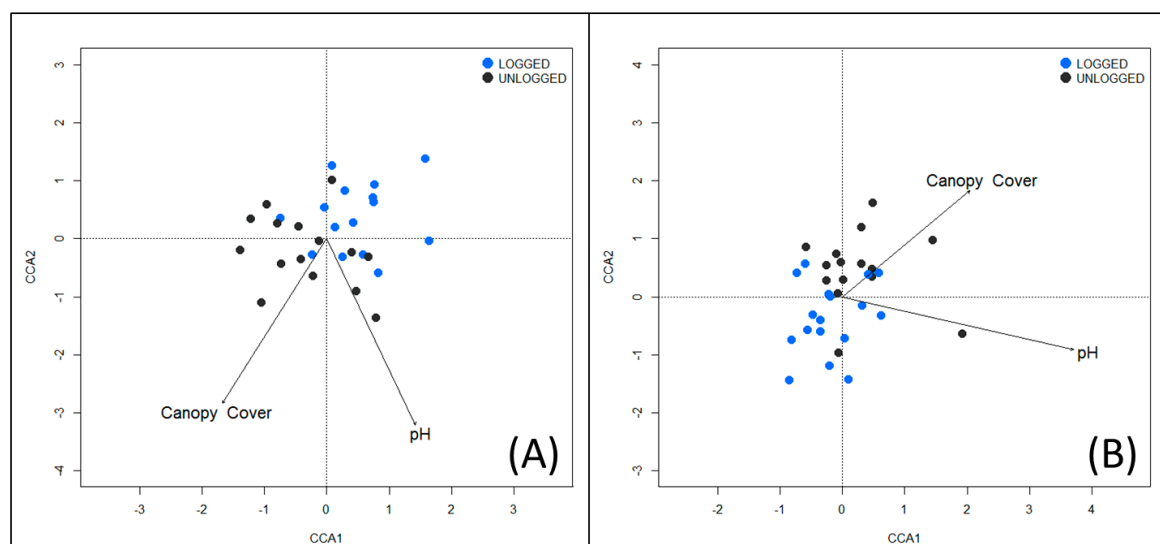

**Figure S1.** Biplot results from the CCA of early seral plant community composition. The biplots show the ordination of sample points in the LOGGED (blue) and UNLOGGED (black) treatments in the (A) EAST and (B) WEST sample sites. Plots were produced using scaling 2.5. The CCA was constrained using canopy cover (Cover) and soil pH (pH).

**Table S1.** Summary of the variability in environmental variables and results from t-tests comparing environmental variables between the LOGGED and UNLOGGED treatments. The variables from top down are Cover (canopy cover; % of sky obscured), Moisture (soil moisture;  $v/v$ ), Temperature (soil temperature;  $^{\circ}\text{C}$ ), Wind.max (maximum wind speed; km/h), pH.CaCl<sub>2</sub> (soil pH), NO<sub>3</sub>N (soil nitrate content; mg/Kg), and NH<sub>4</sub>N (soil ammonium content; mg/Kg).

| Environmental Variable | LOGGED |        |       |       | UNLOGGED |        |       |       | Adjusted $p$ -Value |
|------------------------|--------|--------|-------|-------|----------|--------|-------|-------|---------------------|
|                        | Min.   | Median | Mean  | Max.  | Min.     | Median | Mean  | Max.  |                     |
| Cover                  | 0.00   | 0.00   | 0.05  | 1.45  | 1.17     | 6.81   | 7.61  | 16.18 | <b>0.000</b>        |
| Moisture               | 0.07   | 0.10   | 0.14  | 0.66  | 0.07     | 0.12   | 0.12  | 0.19  | 0.526               |
| Temperature            | 15.80  | 22.10  | 22.20 | 26.70 | 14.30    | 18.80  | 18.96 | 23.57 | <b>0.000</b>        |
| Wind.max               | 0.00   | 5.70   | 5.92  | 2.30  | 0.00     | 3.50   | 3.50  | 11.20 | <b>0.002</b>        |
| pH.CaCl <sub>2</sub>   | 3.92   | 4.40   | 4.43  | 5.21  | 3.95     | 4.53   | 4.60  | 5.82  | 0.139               |
| NO <sub>3</sub> N      | 0.05   | 0.05   | 0.12  | 1.83  | 0.05     | 0.05   | 0.11  | 0.68  | 0.846               |
| NH <sub>4</sub> N      | 10.49  | 19.66  | 20.91 | 36.21 | 9.98     | 23.52  | 23.01 | 41.14 | 0.164               |
